# Supplementary material for: Molecular dynamics study on evaporation of metal nitrate-containing nanodroplets in flame spray pyrolysis
Source: Royal Society of Chemistry journal article supplement (doi:10.1039/d3nr00060e), 2023-01-01
Supplement: d3nr00060e1.pdf [file d3nr00060e1.pdf]

## Supporting Information for

### Molecular dynamics study on evaporation of metal nitrate-containing nanodroplets in flame spray pyrolysis

Dingyu Hou<sup>a</sup>, Geng Wang<sup>a</sup>, Jingqi Gao<sup>a</sup>, Kai H. Luo<sup>a,\*</sup>

<sup>a</sup>Department of Mechanical Engineering, University College London, Torrington Place, London, WC1E 7JE, UK

#### • MD simulation of a pure water droplet for force field validation

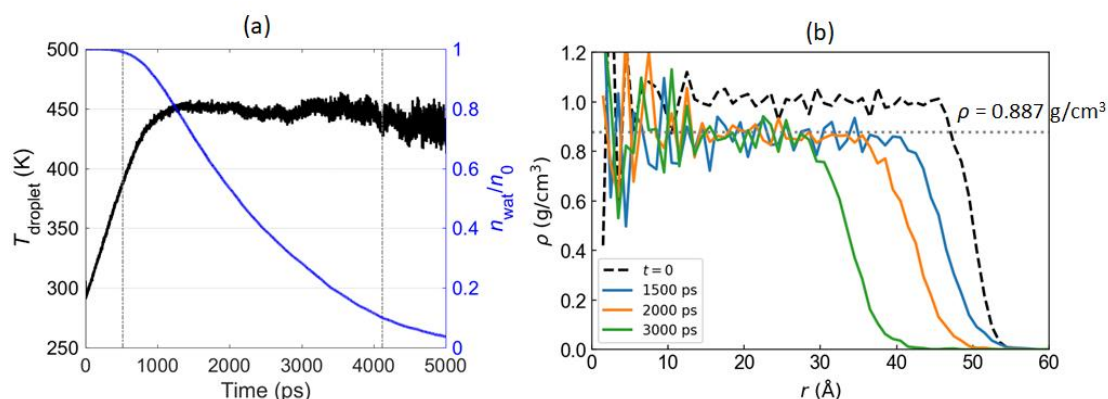

Figure S1 (a) Temporal evolution of the droplet temperature (left y-axis) and the number of water molecules within the droplet (normalized by the initial number of H<sub>2</sub>O molecules  $n_0$ ; right y-axis) during evaporation of a pure water droplet. (b) Radial distribution of mass density at different times during evaporation of a pure water droplet. The initial diameter of the water droplet is 10 nm. Ambient N<sub>2</sub> is at 1000 K.

#### • Calculation of the diffusion coefficient of Ni<sup>2+</sup> in bulk Ni(NO<sub>3</sub>)<sub>2</sub> solution for force field validation

Diffusion coefficient of Ni<sup>2+</sup> in bulk Ni(NO<sub>3</sub>)<sub>2</sub> solutions is calculated based on MD simulations. The solution temperature is 300 K. The water-salt-ratio (WSR; the ratio of the number of water molecules to the number of metal ions) is 50, corresponding to a concentration of 1.1 mol/L.

Figure S2 illustrates the initial simulation configuration of the bulk Ni(NO<sub>3</sub>)<sub>2</sub> solution. Periodic boundary conditions are applied in all three directions. Detailed procedures of calculating the diffusion coefficient ( $D$ ) of Ni<sup>2+</sup> are as follows:

- (1) Build the initial configuration of the bulk Ni(NO<sub>3</sub>)<sub>2</sub> solution by randomly packing 300 Ni<sup>2+</sup>, 600 NO<sub>3</sub><sup>-</sup>, and 15000 H<sub>2</sub>O (WSR = 50) within a cubic simulation box (46 Å × 46 Å × 46 Å) using the PACKMOL software.
- (2) Equilibrate the solution at 300 K, 1 atm. The NPT ensemble (i.e., controlled particle number, pressure, and temperature) is used. Figure S3 shows the potential energy of the Ni(NO<sub>3</sub>)<sub>2</sub> solution versus time, suggesting the system reaches equilibrium state after ~50 ps.
- (3) After the solution reaches equilibrium state at 300 K and 1 atm, five equilibrated structures are randomly (in uniform distribution) selected as the starting configurations to run another 100 ps, during which the mean squared displacement (MSD) of Ni<sup>2+</sup> is recorded.

(4) Diffusion coefficient  $D$  can be extracted from the fitted slope of MSD versus time as

$$\text{MSD} \equiv \left\langle \left| \vec{r}(t) - \vec{r}(0) \right|^2 \right\rangle = 6Dt,$$

where  $\vec{r}(t)$  is the atom position at time  $t$ ,  $\vec{r}(0)$  is the reference position at  $t=0$ , and  $D$  is the diffusion coefficient.

(5) Since MD simulations have statistical noise,  $D$  is calculated based on five different trajectories as described in step (3). The final  $D$  is the averaged results of the five replica runs. The standard deviation of the five replica runs is taken as the uncertainty of the calculated  $D$ .

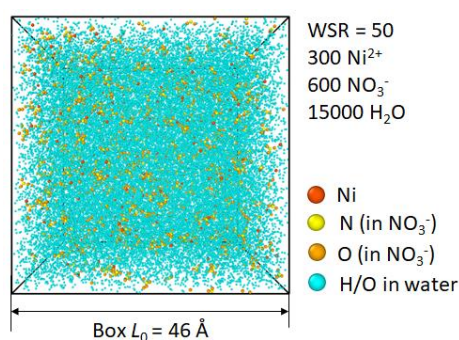

Figure S2 Initial simulation configuration of the bulk Ni(NO<sub>3</sub>)<sub>2</sub> solution.

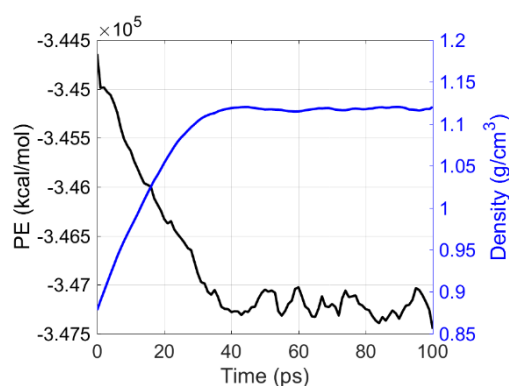

Figure S3 Temporal evolution of the potential energy (left y-axis) and mass density of the system (right y-axis) during equilibration of the bulk Ni(NO<sub>3</sub>)<sub>2</sub> solution at 300 K.

- **Equilibration of a metal-nitrate-containing nanodroplet in vacuum at 300 K**

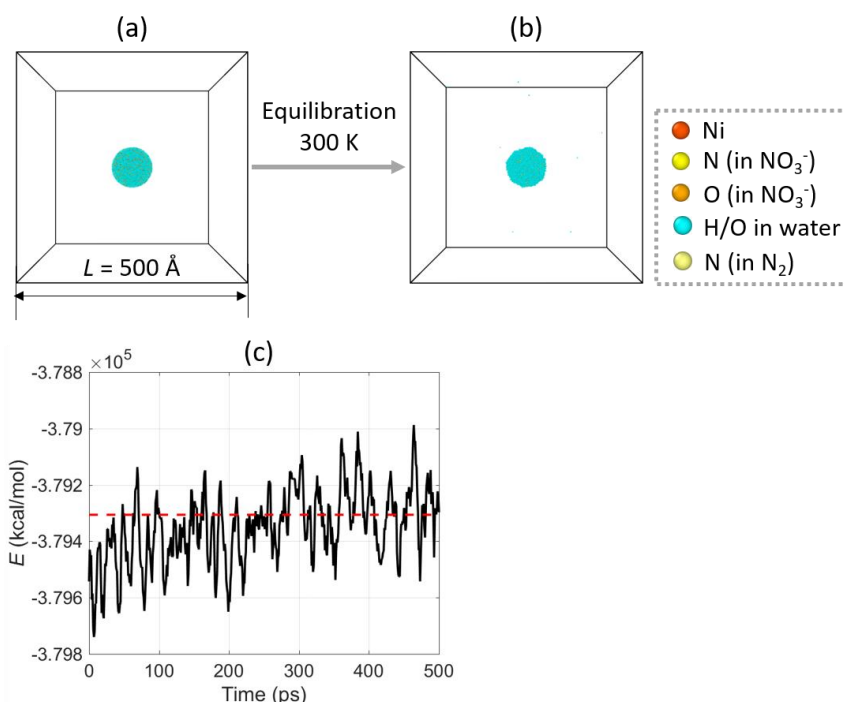

Figure S4 (a) Initial configuration of a 10 nm droplet composed of  $\text{Ni}(\text{NO}_3)_2$  as the solute and  $\text{H}_2\text{O}$  as the solvent. The initial solution concentration is 1.0 mol/L; (b) Configuration of the  $\text{Ni}(\text{NO}_3)_2$ -containing nanodroplet after 500 ps equilibration at 300 K; (c) Potential energy versus time during equilibration of the  $\text{Ni}(\text{NO}_3)_2$ -containing nanodroplet at 300 K.

- **Radial distribution function of the Ni-O atom pair within a  $\text{Ni}(\text{NO}_3)_2$ -containing nanodroplet**

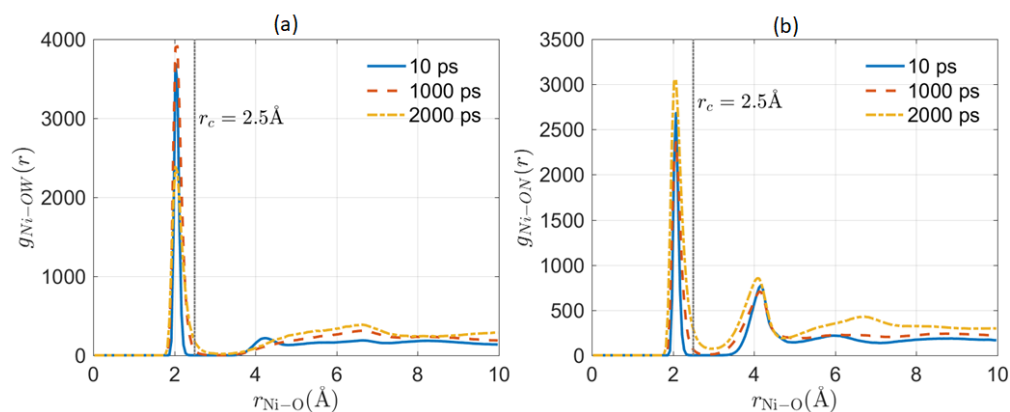

Figure S5 Radial distribution function (RDF) of Ni-OW (OW represents O atoms from water) atom pair (a); and Ni-ON (ON represents O atoms from  $\text{NO}_3^-$ ) (b) at different times during evaporation of a 10 nm  $\text{Ni}(\text{NO}_3)_2$ -containing droplet. The initial solution concentration is 5.4 mol/L. Ambient  $\text{N}_2$  is at 2500 K.

- **MD simulated evaporation rate constant**

Table S1 Evaporation rate constant  $K_{\text{evap}}$  ( $1\text{E-}8 \text{ m/s}^2$ )<sup>a</sup> for a 10 nm  $\text{Ni}(\text{NO}_3)_2$ -containing droplet with

different initial solution concentrations ( $c = 5.4, 3.0, 1.0,$  and  $0.0$  mol/L) evaporating in ambient  $N_2$  at various temperatures ( $T = 1000, 1500, 2000, 2500,$  and  $3000$  K).

| $T \backslash c$ | 5.4           | 3.0           | 1.0           | 0.0 <sup>b</sup> |
|------------------|---------------|---------------|---------------|------------------|
| 1000             | 1.496±0.04944 | 1.931±0.03105 | 2.223±0.07795 | 2.423±0.06171    |
| 1500             | 2.585±0.06626 | 3.775±0.05871 | 4.447±0.1544  | 5.022±0.04239    |
| 2000             | 3.521±0.03857 | 5.648±0.08190 | 7.332±0.1403  | 8.711±0.08393    |
| 2500             | 4.206±0.1509  | 7.695±0.03102 | 10.864±0.2385 | 13.346±0.3030    |
| 3000             | 4.963±0.06451 | 9.577±0.06447 | 14.460±0.2822 | 19.293±0.4110    |

- a. For each initial solution concentration and ambient  $N_2$  temperature,  $K_{\text{evap}}$  is the averaged results of five replica runs with different initial configurations. The standard deviation of the five replica runs is taken as the uncertainty of the calculated  $K_{\text{evap}}$ .
- b. An initial concentration of 0.0 means the evaporation of a 10 nm pure water droplet.  $K_{\text{evap}}$  for a pure  $H_2O$  droplet is obtained by fitting the squared droplet diameter  $d^2$  and time  $t$  into the linear relationship using the data points between 1% and 90%  $H_2O$  molecules are evaporated.
